# Supplementary figures and images for: ISCOMATRIX vaccines mediate CD8+ T-cell cross-priming by a MyD88-dependent signaling pathway
Source: PubMed Central journal article supplement — Immunol Cell Biol. 2011 Sep 6;90(5):540–52. doi: 10.1038/icb.2011.71 (PMC3365289; doi:10.1038/icb.2011.71), 2011-09-06

Supplemental Figure 1.

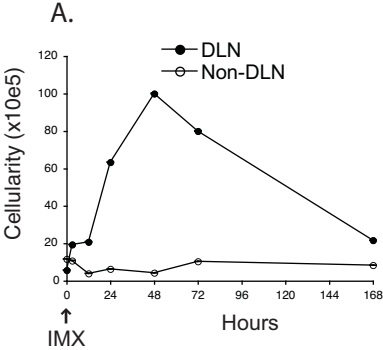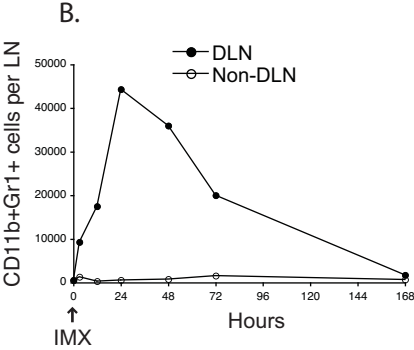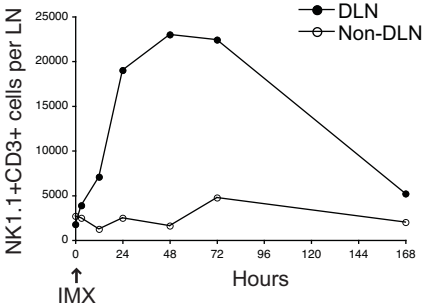

Supplement: icb201171x1.pdf [file icb201171x1.pdf]

Supplemental Figure 2.

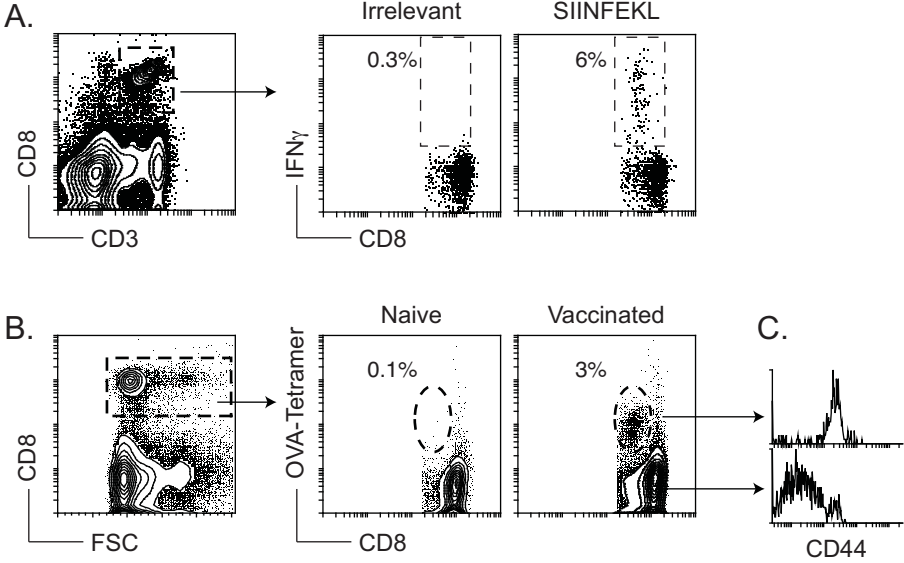

Supplement: icb201171x2.pdf [file icb201171x2.pdf]

Supplemental Figure 3.

A.

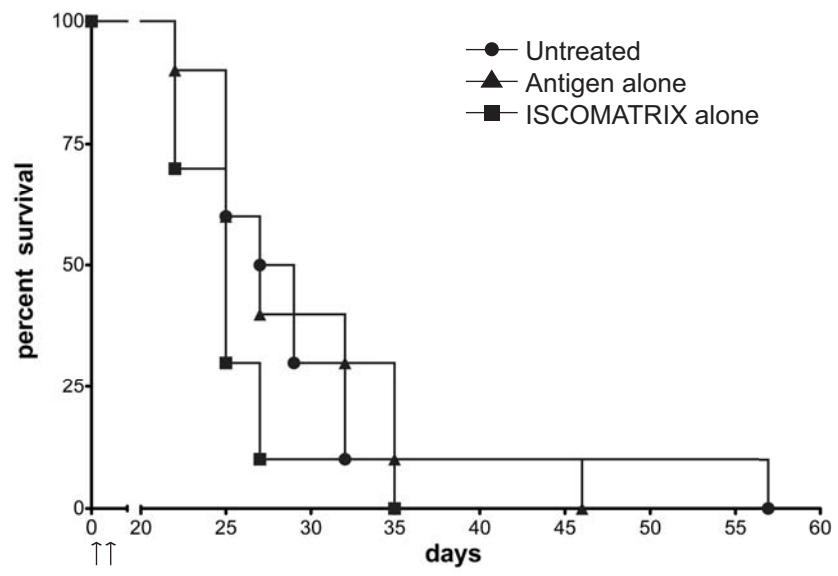

Supplement: icb201171x3.pdf [file icb201171x3.pdf]

Supplemental Figure 4.

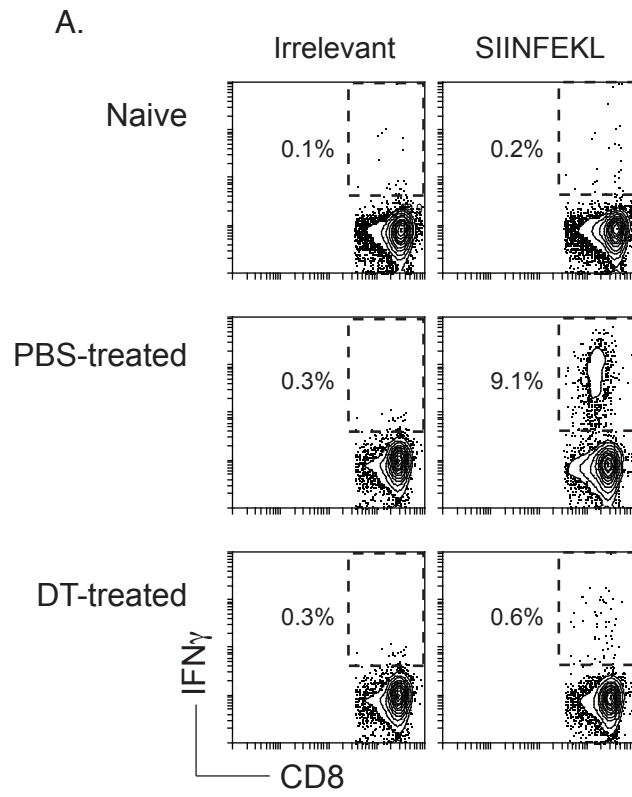

Supplement: icb201171x4.pdf [file icb201171x4.pdf]

Supplemental Figure 5.

A.

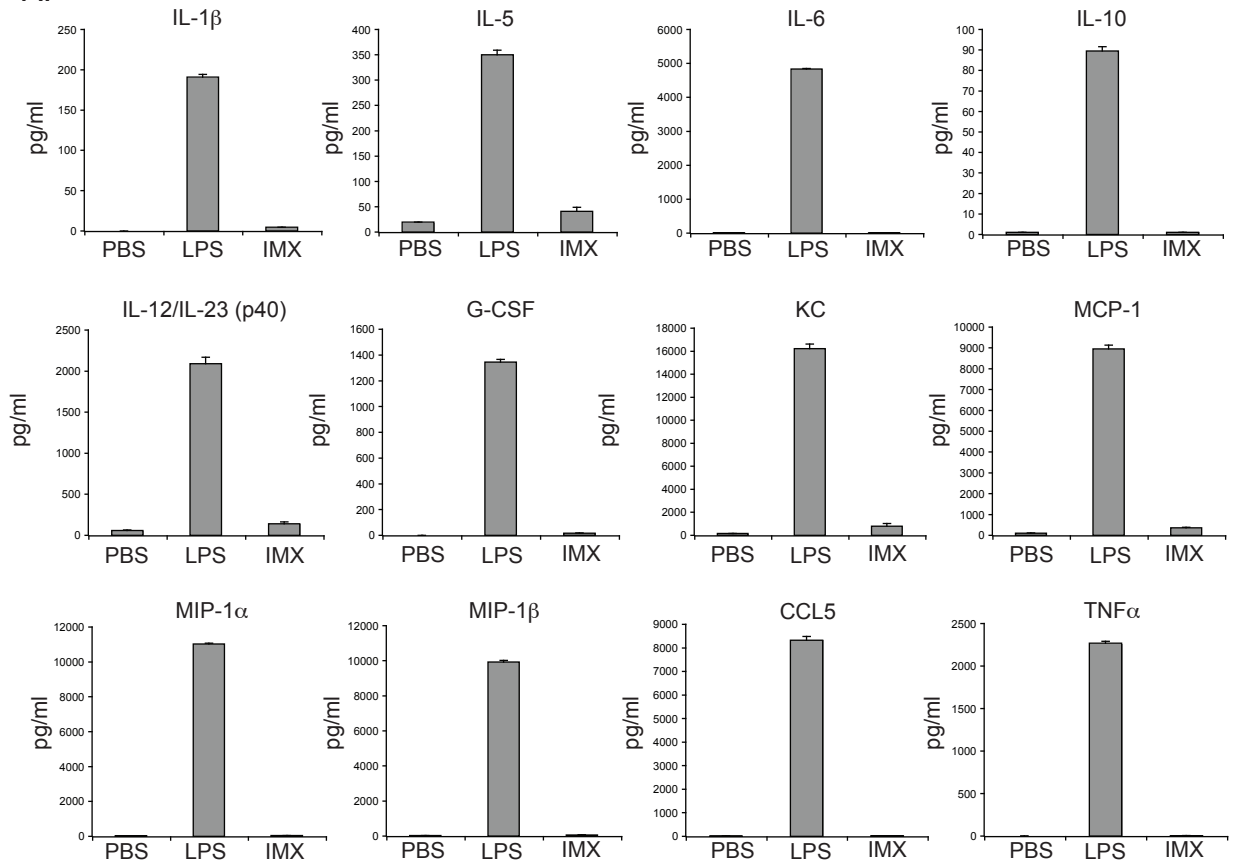

Supplement: icb201171x5.pdf [file icb201171x5.pdf]

Supplemental Figure 6.

A.

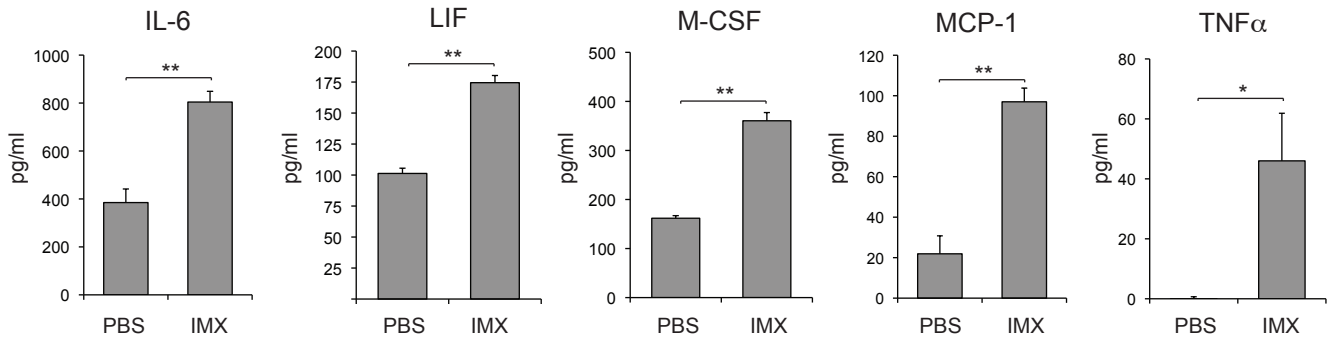

Supplement: icb201171x6.pdf [file icb201171x6.pdf]

Supplemental Figure 7.

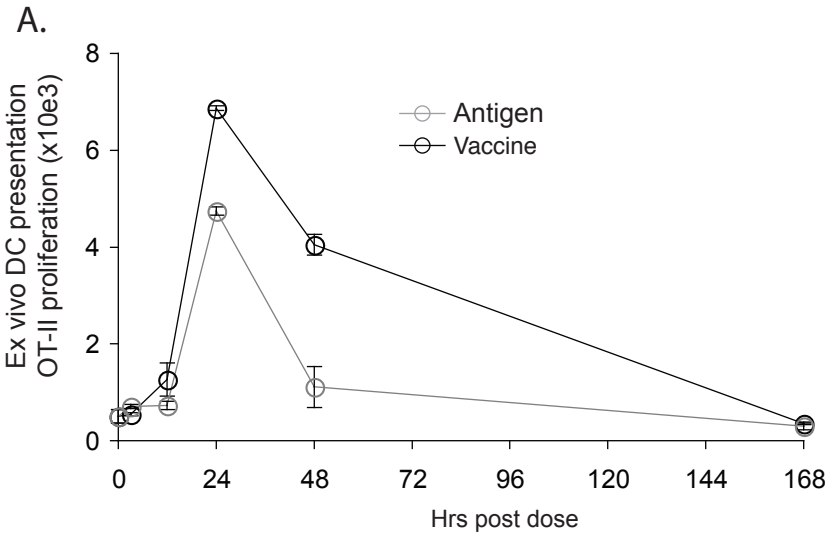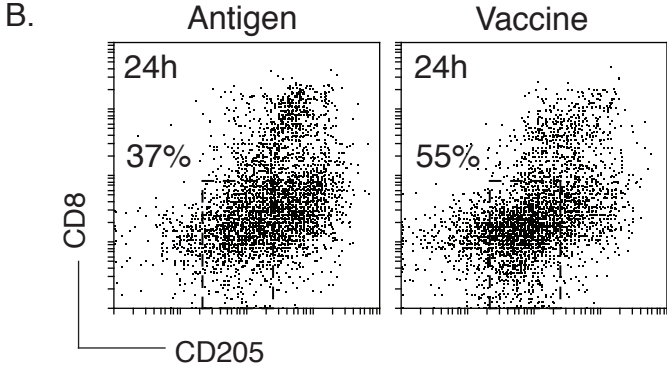

Supplement: icb201171x7.pdf [file icb201171x7.pdf]

Supplemental Figure 8.

A.

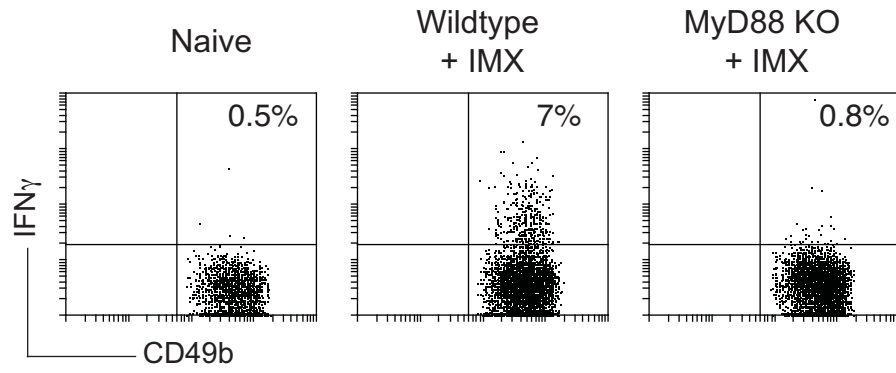

Supplement: icb201171x8.pdf [file icb201171x8.pdf]
